# Supplementary material for: High-throughput screening of the transport behavior of tetragonal perovskites
Source: Royal Society of Chemistry journal article supplement (doi:10.1039/d4cp00109e), 2024-01-01
Supplement: d4cp00109e1.pdf [file d4cp00109e1.pdf]

Supplementary information

High-throughput screening of transport behavior on tetragonal perovskite

Yuanyuan Chen,<sup>1</sup> Lu Xiao,<sup>1</sup> Libin Shi,<sup>1,\*</sup> and Ping Qian<sup>2,†</sup>

<sup>1</sup>*College of Physical Science and Technology, Bohai University, Jinzhou 121013, PR China*

<sup>2</sup>*Beijing Advanced Innovation Center for Materials Genome Engineering, Department of Physics,  
University of Science and Technology Beijing, Beijing 100083, PR China*

---

\* [slb0813@126.com](mailto:slb0813@126.com)

† [qianping@ustb.edu.cn](mailto:qianping@ustb.edu.cn)

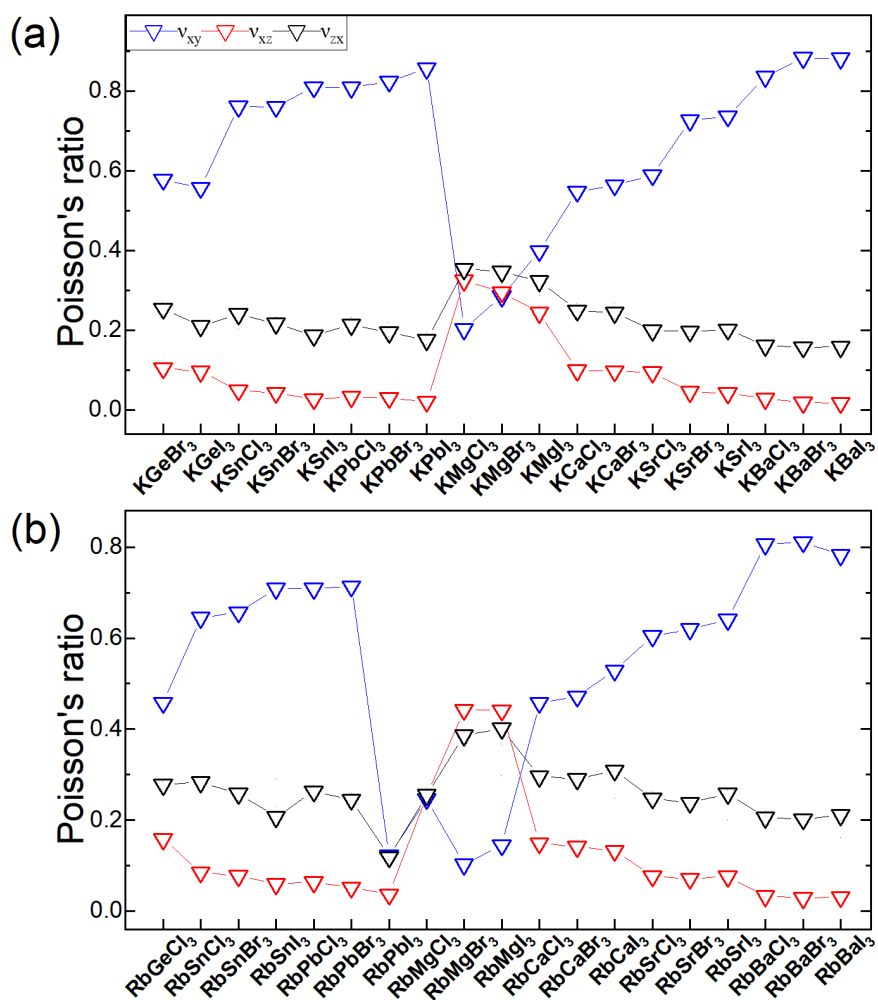

Figure S1. Poisson's ratio for K, Rb-based perovskites. (a) K-based perovskites, (b) Rb-based perovskites.

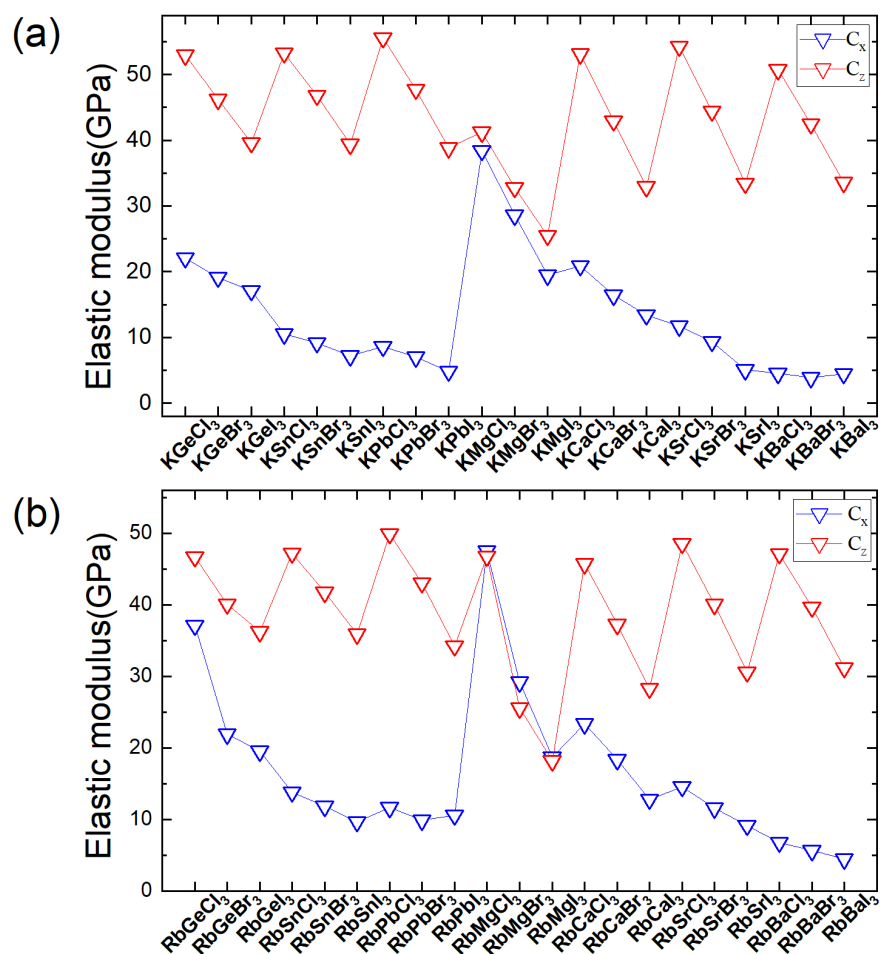

Figure S2. The elastic modulus for K, Rb-based perovskites. (a) K-based perovskites, (b) Rb-based perovskites.

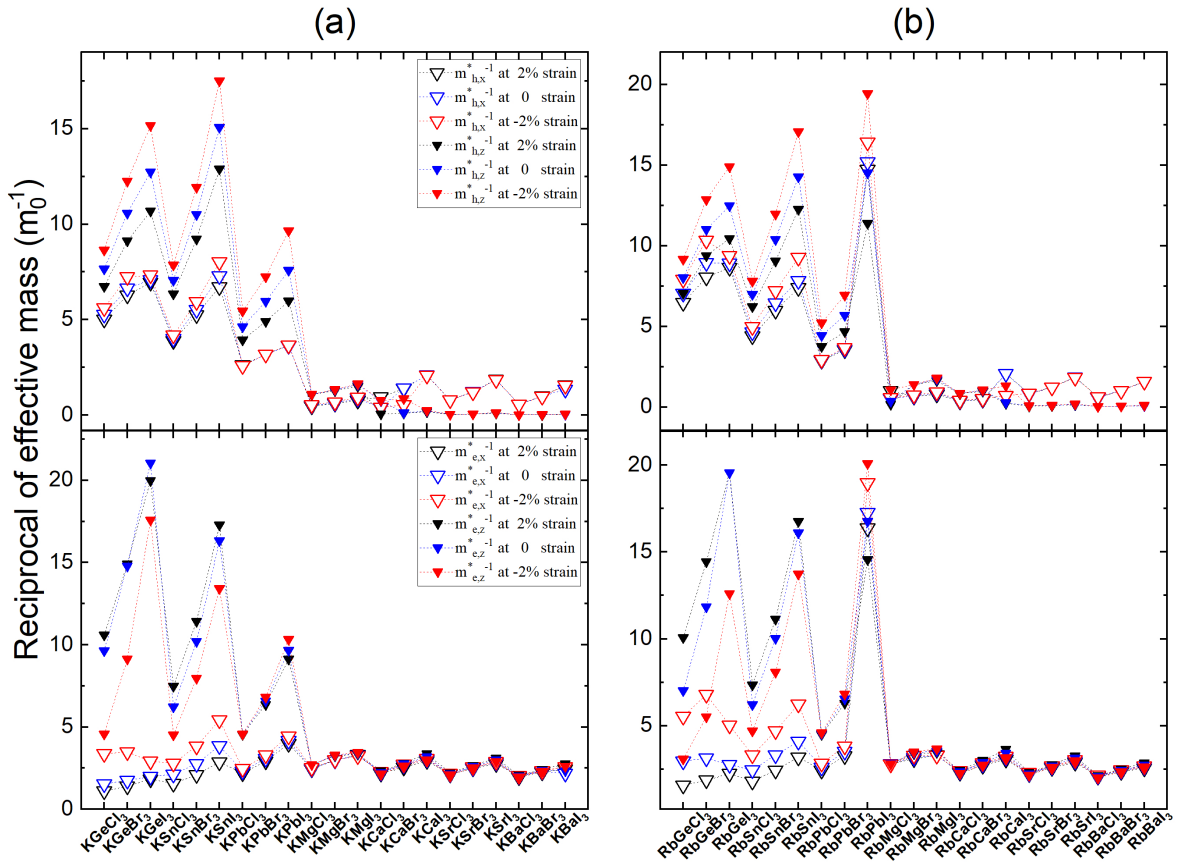

Figure S3. The reciprocal of effective mass for K, Rb-based perovskites. (a) K-based perovskites. (b) Rb-based perovskites.

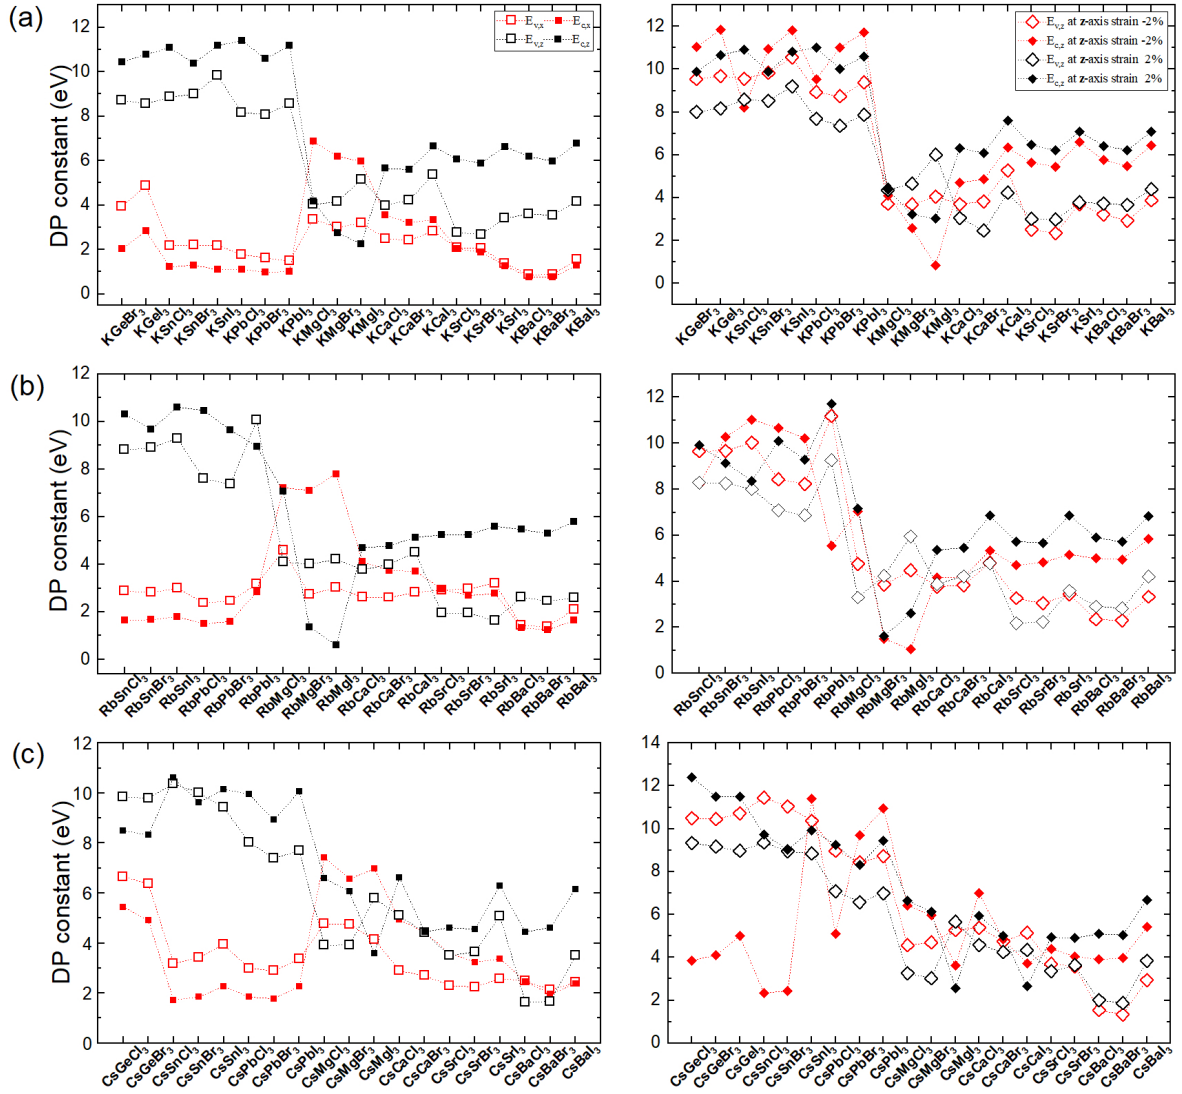

Figure S4. The deformation potential (DP) constant for K, Rb, Cs-based perovskites, which was obtained by the band edge shift at uniaxial strain. (a) K-based perovskites. (b) Rb-based perovskites. (c) Cs-based perovskites.

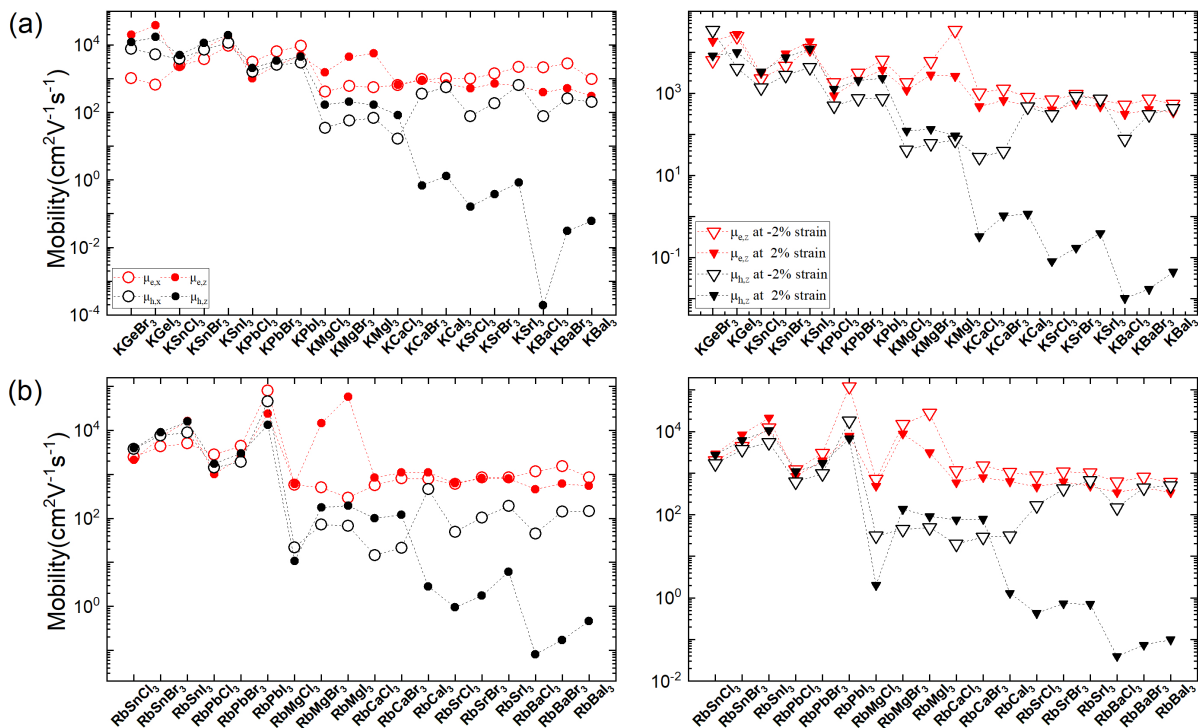

Figure S5. The electron and hole mobilities of K, Rb-based perovskites predicted by the LAP model. (a) K-based perovskites. (b) Rb-based perovskites.

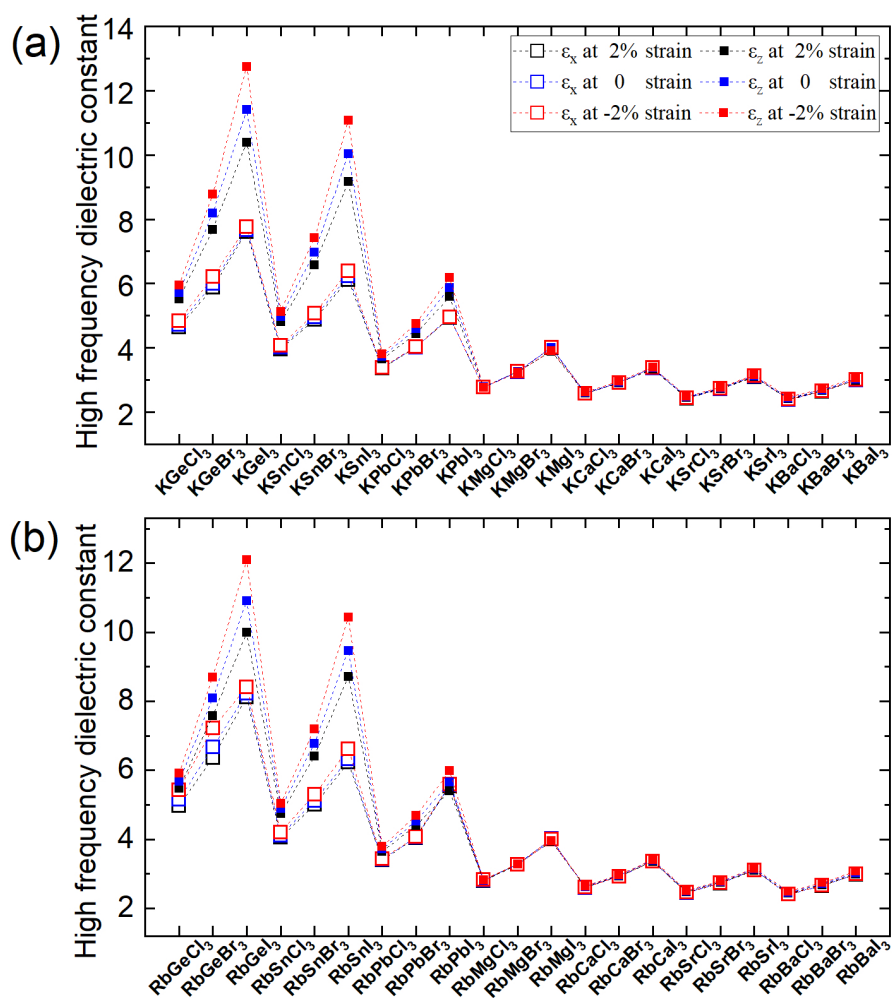

Figure S6. High frequency dielectric constants along  $x$  and  $z$ -axis directions for K, Rb-based perovskites. The results were calculated using fully relaxed lattice and  $z$ -axis strain of  $\pm 2\%$ .

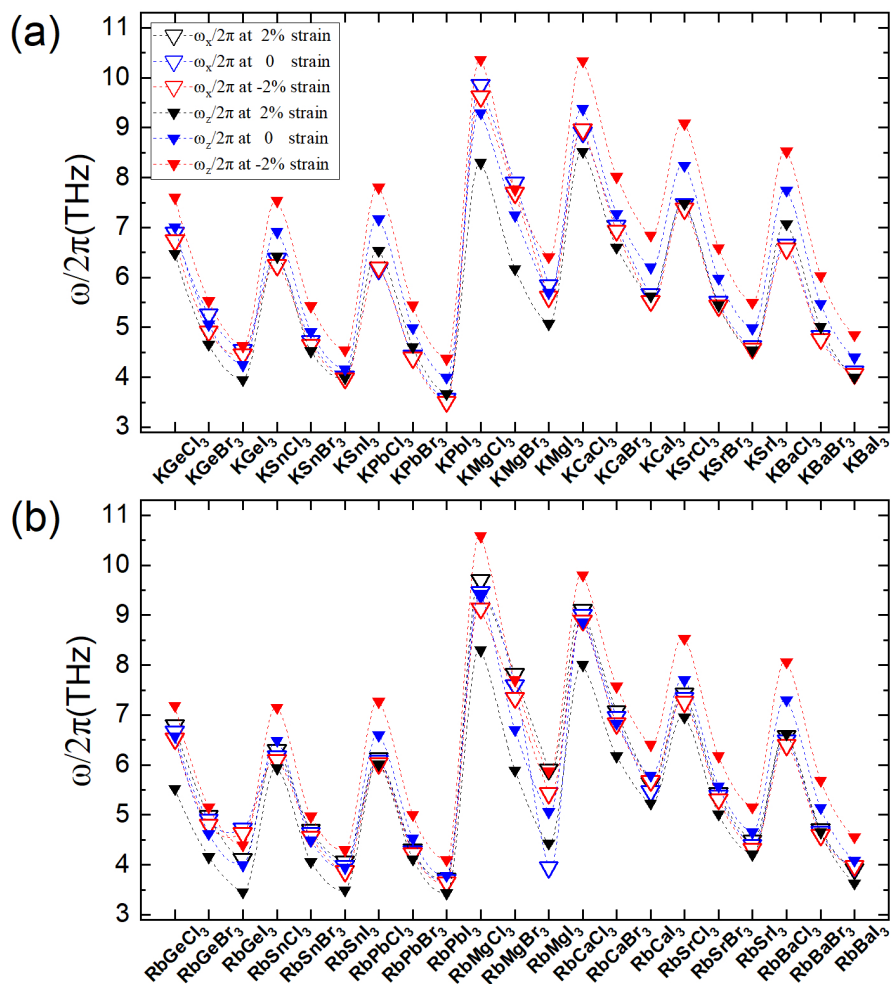

Figure S7. The longitudinal optical phonon frequency of K, Cs-based perovskites. The results were calculated using fully relaxed lattice and  $z$ -axis strain of  $\pm 2\%$ .



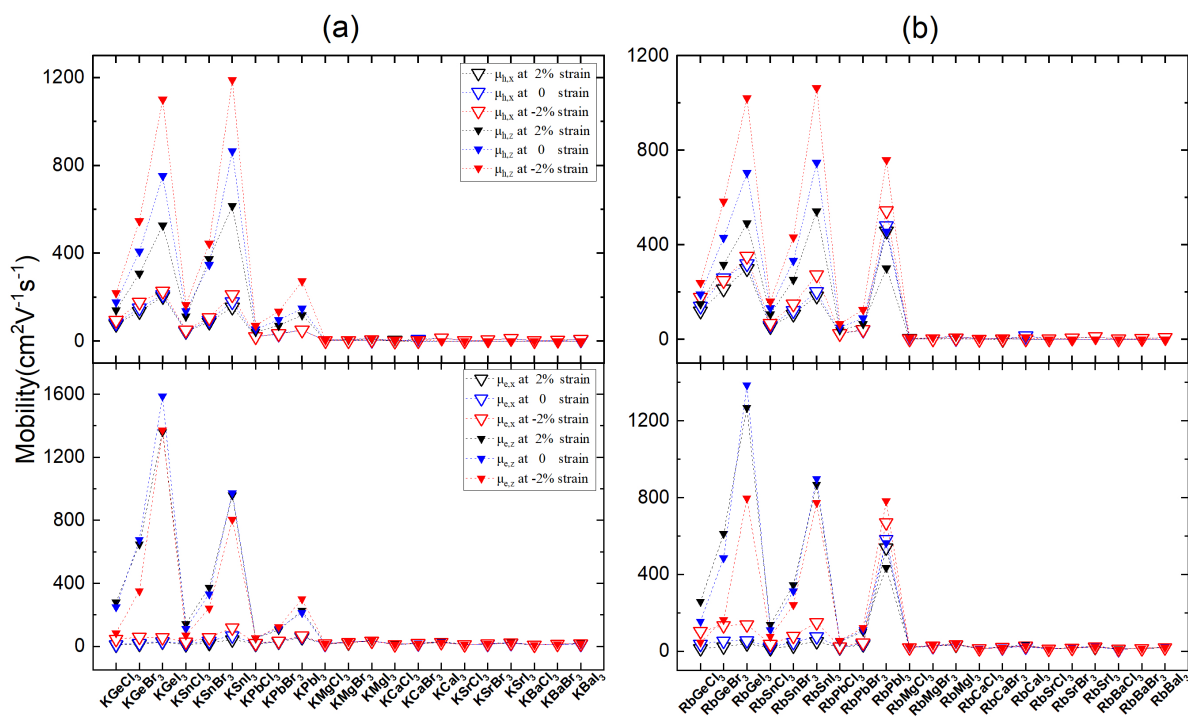

Figure S8. The mobility of K, Rb-based perovskites was predicted by the POP model. (a) K-based perovskites, (b) Rb-based perovskites.

Table S1. Under the compressive strain of -4%, some perovskites were predicted to exhibit high carrier mobility.

| Material            | a/c(Å)    | $\mu_{e,x}(\text{cm}^2\text{V}^{-1}\text{s}^{-1})$ | $\mu_{e,z}(\text{cm}^2\text{V}^{-1}\text{s}^{-1})$ | $\mu_{h,x}(\text{cm}^2\text{V}^{-1}\text{s}^{-1})$ | $\mu_{h,z}(\text{cm}^2\text{V}^{-1}\text{s}^{-1})$ |
|---------------------|-----------|----------------------------------------------------|----------------------------------------------------|----------------------------------------------------|----------------------------------------------------|
| CsGeBr <sub>3</sub> | 7.99/5.38 | 533                                                | 69                                                 | 811                                                | 764                                                |
| CsGeI <sub>3</sub>  | 8.53/5.78 | 1070                                               | 211                                                | 1334                                               | 1665                                               |
| CsSnI <sub>3</sub>  | 8.87/6.10 | 960                                                | 814                                                | 1268                                               | 2013                                               |
| KGeI <sub>3</sub>   | 8.31/5.76 | 197                                                | 392                                                | 261                                                | 1643                                               |
| KSnI <sub>3</sub>   | 8.67/6.03 | 205                                                | 605                                                | 280                                                | 1659                                               |
| RbGeBr <sub>3</sub> | 7.89/5.39 | 376                                                | 83                                                 | 568                                                | 809                                                |
| RbGeI <sub>3</sub>  | 8.42/5.80 | 514                                                | 242                                                | 612                                                | 1555                                               |
| RbSnI <sub>3</sub>  | 8.74/6.08 | 303                                                | 637                                                | 415                                                | 1560                                               |
